# Supplementary material
Source: PubMed Central journal article supplement (PMC5406257)
Supplement: NIHMS847198-supplement-01.pdf [file NIHMS847198-supplement-01.pdf]

## Supplementary Material

|                   |                                                                                                                  |           |
|-------------------|------------------------------------------------------------------------------------------------------------------|-----------|
| <b>Table S1.</b>  | Targets on gene expression array.....                                                                            | <b>2</b>  |
| <b>Table S2.</b>  | Comparison between the studied RISK cohort subset and overall RISK cohort.....                                   | <b>3</b>  |
| <b>Table S3.</b>  | Characteristics of the Cincinnati Cohort patients.....                                                           | <b>5</b>  |
| <b>Table S4.</b>  | Univariate logistic regression for discriminating UC from CDc.....                                               | <b>7</b>  |
| <b>Table S5.</b>  | Change in effect estimate after bivariate analyses with <i>S100A8</i> .....                                      | <b>7</b>  |
| <b>Table S6.</b>  | Inclusion of <i>S100A8</i> in multivariate logistic regression model for discriminating UC from CDc.....         | <b>7</b>  |
| <b>Table S7.</b>  | Univariate logistic regression of gene expression for predicting UC clinical outcomes.....                       | <b>8</b>  |
| <b>Table S8.</b>  | Comparison of baseline characteristics and medication exposures between UC patient gene expression clusters..... | <b>9</b>  |
| <b>Figure S1.</b> | Identification of GAPDH as reference gene with least expression variation across diagnosis groups.....           | <b>10</b> |
| <b>Figure S2.</b> | Analysis of Cincinnati cohort rectal mucosa real-time RT-qPCR controlling for histologic disease activity.....   | <b>11</b> |

**Table S1.** Targets on gene expression array

| Gene             | Protein Function                                                             | Assay ID      |
|------------------|------------------------------------------------------------------------------|---------------|
| <i>IL4</i>       | Type 2 cytokine                                                              | Hs00174122_m1 |
| <i>IL5</i>       | Type 2 cytokine                                                              | Hs00174200_m1 |
| <i>IL13</i>      | Type 2 cytokine                                                              | Hs00174379_m1 |
| <i>IL13RA2</i>   | Type 2 cytokine receptor/protein induced by IL-13                            | Hs00152924_m1 |
| <i>IL33</i>      | Cytokine that induces type 2 immune responses                                | Hs01125943_m1 |
| <i>IL1RL1(s)</i> | IL-33 Receptor (soluble) that regulates type 2 immune responses              | Hs01073297_m1 |
| <i>IL1RL1(m)</i> | IL-33 Receptor (membrane) that induces type 2 immune responses               | Hs01073295_m1 |
| <i>CCL11</i>     | Chemokine associated with eosinophil recruitment and type 2 immune responses | Hs00237013_m1 |
| <i>CHI3L1</i>    | Protein induced by type 2 immune responses                                   | Hs00609691_m1 |
| <i>ICOS</i>      | T cell co-stimulatory molecular that augments type 2 immune responses        | Hs00359999_m1 |
| <i>GATA3</i>     | Type 2 T cell transcription factor                                           | Hs00231122_m1 |
| <i>RORA</i>      | Group 2 ILC transcription factor                                             | Hs00536545_m1 |
| <i>CLDN2</i>     | Tight junction protein induced by IL-13                                      | Hs01549234_m1 |
| <i>IFNG</i>      | Type 2 cytokine                                                              | Hs00174143_m1 |
| <i>TBX21</i>     | Type 1 transcription factor                                                  | Hs00203436_m1 |
| <i>IL17A</i>     | Type 17 cytokine                                                             | Hs00174383_m1 |
| <i>IL23A</i>     | Cytokine that augments type 17 immune responses                              | Hs00372324_m1 |
| <i>RORC</i>      | Type 17 transcription factor                                                 | Hs01076122_m1 |
| <i>IL22</i>      | Type 17 cytokine                                                             | Hs01574154_m1 |
| <i>AHR</i>       | Group 3 ILC transcription factor                                             | Hs00169233_m1 |
| <i>IL10</i>      | T regulatory cell cytokine                                                   | Hs00174086_m1 |
| <i>TGFB1</i>     | Cytokine that induces T regulatory cell and type 17 T cell differentiation   | Hs00171257_m1 |
| <i>S100A8</i>    | Component of calprotectin/marker of inflammation                             | Hs00374264_g1 |
| <i>GAPDH</i>     | Reference gene                                                               | Hs99999905_m1 |

**Table S2.** Comparison between the studied RISK cohort subset and overall RISK cohort

|                                | Entire RISK Cohort (n = 1812) | Non-IBD                 |                       | CDic                    |                       | CDc                     |                       | UC                      |                       |
|--------------------------------|-------------------------------|-------------------------|-----------------------|-------------------------|-----------------------|-------------------------|-----------------------|-------------------------|-----------------------|
|                                |                               | Studied Subset (n = 49) | RISK Cohort (n = 408) | Studied Subset (n = 46) | RISK Cohort (n = 606) | Studied Subset (n = 36) | RISK Cohort (n = 210) | Studied Subset (n = 56) | RISK Cohort (n = 200) |
| Age, y                         | 12.7<br>(9.9,14.9)            | 12.8<br>(10.8,15.0)     | 12.7<br>(9.5,15.0)    | 12.4<br>(10.9,13.6)     | 12.4<br>(9.9,14.7)    | 12.7<br>(10.8,14.5)     | 12.5<br>(9.4,15.0)    | 13.5<br>(10.8,15.5)     | 13.1<br>(10.2,15.0)   |
| A1a: 0 – <10 y                 | 460 (25.4)                    | 9 (18.4)                | 116 (28.7)            | 11 (23.9)               | 152 (25.1)            | 6 (17.1)                | 57 (27.1)             | 13 (23.2)               | 49 (24.5)             |
| A1b: 10 – <17 y                | 1348 (74.6)                   | 39 (79.6)               | 288 (71.3)            | 35 (76.1)               | 454 (74.9)            | 30 (85.7)               | 153 (72.9)            | 43 (76.8)               | 151 (75.5)            |
| Male sex                       | 1055 (58.2)                   | 23 (46.9)               | 226 (55.4)            | 25 (54.3)               | 377 (62.2)            | 17 (47.2)               | 120 (57.1)            | 30 (53.6)               | 106 (53.0)            |
| Diagnosis                      |                               |                         |                       |                         |                       |                         |                       |                         |                       |
| Non-IBD                        | 408 (22.5)                    | 49 (100)                | 408 (100)             | 0 (0)                   | 0 (0)                 | 0 (0)                   | 0 (0)                 | 0 (0)                   | 0 (0)                 |
| CD                             | 1118 (61.7)                   | 0 (0)                   | 0 (0)                 | 46 (100)                | 606 (100)             | 36 (100)                | 210 (100)             | 0 (0)                   | 0 (0)                 |
| UC                             | 200 (11.0)                    | 0 (0)                   | 0 (0)                 | 0 (0)                   | 0 (0)                 | 0 (0)                   | 0 (0)                 | 56 (100)                | 200 (100)             |
| IBD-U                          | 86 (4.7)                      | 0 (0)                   | 0 (0)                 | 0 (0)                   | 0 (0)                 | 0 (0)                   | 0 (0)                 | 0 (0)                   | 0 (0)                 |
| CD location*                   |                               |                         |                       |                         |                       |                         |                       |                         |                       |
| L1                             | 181 (16.2)                    |                         |                       | 0 (0)                   | 0 (0)                 | 0 (0)                   | 0 (0)                 |                         |                       |
| L2:                            | 210 (18.8)                    |                         |                       | 0 (0)                   | 0 (0)                 | 36 (100)                | 210 (100)             |                         |                       |
| L3                             | 606 (54.2)                    |                         |                       | 46 (100)                | 606 (100)             | 0 (0)                   | 0 (0)                 |                         |                       |
| L4 only                        | 18 (1.6)                      |                         |                       | 0 (0)                   | 0 (0)                 | 0 (0)                   | 0 (0)                 |                         |                       |
| Insufficient Data              | 103 (9.2)                     |                         |                       | 0 (0)                   | 0 (0)                 | 0 (0)                   | 0 (0)                 |                         |                       |
| Upper GI                       |                               |                         |                       |                         |                       |                         |                       |                         |                       |
| L4a                            | 531 (47.5)                    |                         |                       | 32 (69.6)               | 322 (53.1)            | 17 (47.2)               | 82 (39.0)             |                         |                       |
| L4b                            | 147 (13.1)                    |                         |                       | 12 (26.1)               | 97 (16.0)             | 0 (0)                   | 20 (9.5)              |                         |                       |
| UC extent <sup>†</sup>         |                               |                         |                       |                         |                       |                         |                       |                         |                       |
| E1                             | 5 (2.5)                       |                         |                       |                         |                       |                         |                       | 2 (3.6)                 | 5 (2.5)               |
| E2                             | 26 (13.0)                     |                         |                       |                         |                       |                         |                       | 7 (12.5)                | 26 (13.0)             |
| E3                             | 22 (11.0)                     |                         |                       |                         |                       |                         |                       | 7 (12.5)                | 22 (11.0)             |
| E4                             | 112 (56.0)                    |                         |                       |                         |                       |                         |                       | 36 (64.3)               | 112 (56.0)            |
| Insufficient data              | 35 (17.5)                     |                         |                       |                         |                       |                         |                       | 4 (7.1)                 | 35 (17.5)             |
| Macroscopic rectal involvement | 846 (60.3)                    |                         |                       | 46 (100)                | 409 (67.5)            | 36 (100)                | 157 (74.8)            | 56 (100)                | 177 (88.5)            |
| PGA                            |                               |                         |                       |                         |                       |                         |                       |                         |                       |

|                    |            |           |            |           |            |            |            |
|--------------------|------------|-----------|------------|-----------|------------|------------|------------|
| Quiescent          | 50 (3.6)   | 0 (0)     | 13 (2.1)   | 1 (2.8)   | 11 (5.2)   | 1 (1.8)    | 7 (3.5)    |
| Mild               | 458 (32.6) | 11 (23.9) | 168 (27.7) | 7 (19.4)  | 62 (29.5)  | 20 (35.7)  | 63 (31.5)  |
| Moderate           | 684 (48.7) | 22 (47.8) | 324 (53.5) | 19 (52.8) | 106 (50.5) | 23 (41.1)  | 101 (50.5) |
| Severe             | 209 (14.9) | 13 (28.3) | 98 (16.2)  | 9 (25.0)  | 31 (14.8)  | 12 (21.4)  | 29 (14.5)  |
| Insufficient data  | 3 (0.2)    | 0 (0)     | 3 (0.5)    | 0 (0)     | 0 (0)      | 0 (0)      | 0 (0)      |
| PUCAI              | 45 (30,60) |           |            |           |            | 45 (35,60) | 45 (30,60) |
| Rectal deep ulcers | 158 (11.3) | 5 (10.9)  | 75 (12.4)  | 12 (33.3) | 36 (17.1)  | 10 (17.9)  | 28 (14.0)  |

Quantitative variables expressed as median (quartile 1, quartile 3) and dichotomous variables as n (%).

\*L1, terminal ileal ± limited cecal disease; L2, colonic; L3, ileocolonic; L4, upper GI disease; L4a, upper GI disease proximal to ligament of Treitz, L4b: upper GI disease distal to ligament of Treitz

†E1, ulcerative proctitis; E2, left-sided colitis; E3, extensive colitis; E4, pancolitis

CD, Crohn's disease; CDc, colon-only Crohn's disease; CDic, ileocolonic Crohn's disease; IBD, inflammatory bowel disease; IBD-U, inflammatory bowel disease unclassified; PGA, physicians global assessment; PUCAI, Pediatric Ulcerative Colitis Activity Index; UC, ulcerative colitis

**Table S3.** Characteristics of the Cincinnati Cohort patients

|                                                   | Non-IBD (n = 17) | CD (n = 20)     | UC (n = 14)      |
|---------------------------------------------------|------------------|-----------------|------------------|
| Age at biopsy collection, y                       | 15.8 (10.5,16.6) | 15.0 (11.2,6.7) | 18.0 (14.5,19.0) |
| Male sex                                          | 7 (41.2)         | 15 (75.0)       | 25 (54.3)        |
| Age at diagnosis, y                               |                  | 10.6 (9.2,10.6) | 14.4 (11.6,16.5) |
| A1a: 0–<10 y                                      |                  | 8 (40.0)        | 3 (21.4)         |
| A1b: 10–<17 y                                     |                  | 11 (55.0)       | 10 (71.4)        |
| A2: 17–40 y                                       |                  | 1 (5.0)         | 1 (7.1)          |
| Time since diagnosis, y                           |                  | 2.2 (0,4.7)     | 2.8 (1.0,6.2)    |
| Biopsy collected at diagnostic endoscopy          |                  | 9 (45.0)        | 0 (0.0)          |
| CD location                                       |                  |                 |                  |
| L1: terminal ileal ± limited cecal disease        |                  | 0 (0)           | 0 (0)            |
| L2: colonic                                       |                  | 8 (40.0)        | 0 (0)            |
| L3: ileocolonic                                   |                  | 12 (60.0)       | 46 (100)         |
| L4a: upper disease proximal to ligament of Treitz |                  | 11 (55.0)       | 32 (69.6)        |
| L4b: upper disease distal to ligament of Treitz   |                  | 2 (10.0)        | 12 (26.1)        |
| UC extent                                         |                  |                 |                  |
| E1: ulcerative proctitis                          |                  |                 | 1 (7.1)          |
| E2: left-sided colitis                            |                  |                 | 3 (21.4)         |
| E3: extensive colitis                             |                  |                 | 3 (21.4)         |
| E4: pancolitis                                    |                  |                 | 7 (50.0)         |
| Macroscopic rectal involvement                    |                  | 20 (100)        | 14 (100)         |
| Clinical Disease Activity                         |                  |                 |                  |
| shPCDAI                                           |                  | 25 (12.5,35)    |                  |
| PUCAI                                             |                  |                 | 30 (15,60)       |
| Endoscopic Disease Activity                       |                  |                 | 22 (47.8)        |

|                                  |             |           |
|----------------------------------|-------------|-----------|
| SES-CD                           | 12 (8.5,17) |           |
| Mayo Endoscopic Score            |             |           |
| Mild                             |             | 4 (28.6)  |
| Moderate                         |             | 3 (21.4)  |
| Severe                           |             | 7 (50.0)  |
| Medications                      |             |           |
| None                             | 5 (25.0)    | 0 (0.0)   |
| Oral corticosteroids             | 2 (10.0)    | 7 (50.0)  |
| Rectal corticosteroids           | 1 (5.0)     | 2 (14.3)  |
| Oral 5-ASA                       | 4 (20.0)    | 10 (71.4) |
| Antibiotic                       | 3 (15.0)    | 0 (0.0)   |
| 6-mercaptopurine or azathioprine | 5 (25.0)    | 2 (14.3)  |
| Methotrexate                     | 0 (0.0)     | 1 (7.1)   |
| Anti-TNF biologic                | 2 (10.0)    | 3 (21.4)  |

---

Quantitative variables expressed as median (quartile 1, quartile 3) and dichotomous variables as n (%).  
5-ASA, 5-aminosalicylic acid; CD, Crohn's disease; IBD, inflammatory bowel disease; PUCAI, Pediatric Ulcerative Colitis Activity Index; SES-CD, Simple Endoscopic Score for Crohn's Disease; shPCDAI, Short Pediatric Crohn's Disease Activity Index; TNF, tumor necrosis factor; UC, ulcerative colitis

**Table S4.** Univariate logistic regression for discriminating UC from CDc

| Gene             | OR*   | (95% CI)      | P value |
|------------------|-------|---------------|---------|
| <i>IL5</i>       | 1.147 | (1.050–1.644) | .003    |
| <i>IL13</i>      | 1.100 | (.998–1.212)  | .056    |
| <i>IL13RA2</i>   | 1.311 | (1.045–1.644) | .020    |
| <i>IL1RL1(m)</i> | 1.798 | (1.129–2.865) | .014    |
| <i>ICOS</i>      | 1.435 | (.923–2.229)  | .109    |
| <i>IL17A</i>     | 1.265 | (1.032–1.551) | .024    |
| <i>IL23A</i>     | 1.391 | (1.063–1.821) | .016    |

\*Odds of a diagnosis of UC over CDc per unit increase in Cq value for the listed gene. CI, confidence interval; Cq, quantification cycle; OR, odds ratio

**Table S5.** Change in effect estimate after bivariate analyses with *S100A8*

| Gene             | Effect estimate |           | Change (%) |
|------------------|-----------------|-----------|------------|
|                  | Univariate      | Bivariate |            |
| <i>IL5</i>       | .138            | .126      | – 8.6      |
| <i>IL13</i>      | .095            | .078      | – 18.1     |
| <i>IL13RA2</i>   | .270            | .332      | + 22.8     |
| <i>IL1RL1(m)</i> | .587            | .561      | – 4.4      |
| <i>ICOS</i>      | .361            | .277      | – 23.3     |
| <i>IL17A</i>     | .235            | .232      | – 1.7      |
| <i>IL23A</i>     | .330            | .328      | – .7       |

**Table S6.** Inclusion of *S100A8* in multivariate logistic regression model for discriminating UC from CDc

| Gene          | OR*   | 95% CI      | P-value |
|---------------|-------|-------------|---------|
| <i>IL5</i>    | 1.133 | 1.032–1.238 | .009    |
| <i>IL17A</i>  | 1.232 | .976–1.467  | .132    |
| <i>S100A8</i> | .959  | .747–1.233  | .747    |

\*Odds of a diagnosis of UC over CDc per unit increase in Cq value for the listed gene. CI, confidence interval; Cq, quantification cycle; OR, odds ratio

**Table S7.** Univariate logistic regression of gene expression for predicting UC clinical outcomes

| Gene             | Remission          |                |                    |                | Response                   |                |                            |                |
|------------------|--------------------|----------------|--------------------|----------------|----------------------------|----------------|----------------------------|----------------|
|                  | 6 month            |                | 12 month           |                | 6 month                    |                | 12 month                   |                |
|                  | OR (95% CI)        | <i>P</i> value | OR (95% CI)        | <i>P</i> value | OR (95% CI)                | <i>P</i> value | OR (95% CI)                | <i>P</i> value |
| <i>IL5</i>       | 1.119 (.978–1.279) | .104           | 1.050 (.921–1.198) | .466           | 1.116 (.981–1.271)         | .095           | 1.126 (.979–1.294)         | .094           |
| <i>IL13</i>      | 1.115 (.973–1.279) | .118           | 1.126 (.978–1.297) | .099           | <b>1.182 (1.028–1.359)</b> | <b>.019</b>    | <b>1.172 (1.012–1.359)</b> | <b>.034</b>    |
| <i>IL13RA2</i>   | 1.350 (.939–1.942) | .105           | .847 (.595–1.208)  | .359           | 1.206 (.855–1.701)         | .286           | 1.046 (.733–1.493)         | .804           |
| <i>IL1RL1(m)</i> | 1.241 (.618–2.494) | .543           | .716 (.331–1.550)  | .397           | 1.751 (.786–3.891)         | .144           | .690 (.314–1.517)          | .356           |
| <i>ICOS</i>      | 1.151 (.581–2.283) | .686           | 1.198 (.631–2.273) | .582           | 1.032 (.515–2.066)         | .930           | 1.103 (.570–2.137)         | .772           |
| <i>IL17A</i>     | 1.253 (.919–1.706) | .153           | 1.111 (.854–1.445) | .433           | 1.239 (.929–1.650)         | .170           | 1.117 (.861–1.449)         | .407           |
| <i>IL23A</i>     | 1.311 (.887–1.934) | .175           | 1.071 (.746–1.538) | .711           | 1.199 (.813–1.767)         | .360           | 1.047 (.718–1.527)         | .810           |

\*Odds of outcome per unit increase in Cq value for the listed gene.

CI, confidence interval; Cq, quantification cycle; OR, odds ratio



**Table S8.** Comparison of baseline characteristics and medication exposures between UC patient gene expression clusters

|                                 | Clusters 1-3 (n = 33) | Clusters 4-5 (n = 13) | P value |
|---------------------------------|-----------------------|-----------------------|---------|
| <b>Baseline characteristics</b> |                       |                       |         |
| Age, y                          | 13.6 (10.7-15.1)      | 12.2 (11.5-15.8)      | .813    |
| Male sex                        | 19 (57.6)             | 5 (38.5)              | .330    |
| <b>UC extent</b>                |                       |                       |         |
| E1: ulcerative proctitis        | 1 (3.1)               | 0 (0)                 | .246*   |
| E2: left-sided colitis          | 2 (6.3)               | 2 (15.4)              |         |
| E3: extensive colitis           | 4 (12.5)              | 4 (30.8)              |         |
| E4: pancolitis                  | 25 (78.1)             | 7 (53.8)              |         |
| Data not available              | 1 (3.1)               | 0 (0)                 |         |
| <b>PGA</b>                      |                       |                       |         |
| Quiescent                       | 1 (3.0)               | 0 (0)                 | .546*   |
| Mild                            | 15 (45.5)             | 4 (30.8)              |         |
| Moderate                        | 9 (27.3)              | 5 (38.5)              |         |
| Severe                          | 8 (24.2)              | 4 (30.8)              |         |
| Rectal deep ulcers              | 5 (15.6)              | 2 (15.4)              | 1.00    |
| <b>Medication exposures</b>     |                       |                       |         |
| 6-month                         | (n = 31)              | (n = 13)              |         |
| Corticosteroids                 | 24 (77.4)             | 12 (92.3)             | .401    |
| 5-ASA                           | 24 (77.4)             | 11 (84.6)             | .703    |
| Thiopurines                     | 10 (32.3)             | 6 (46.2)              | .496    |
| Methotrexate                    | 0 (0)                 | 0 (0)                 | –       |
| Anti-TNF biologic               | 5 (16.1)              | 4 (30.8)              | .414    |
| 12-month                        | (n = 28)              | (n = 11)              |         |
| Corticosteroids                 | 23 (82.1)             | 10 (90.9)             | .655    |
| 5-ASA                           | 22 (78.6)             | 9 (81.8)              | 1.00    |
| Thiopurines                     | 12 (46.4)             | 4 (36.4)              | .725    |
| Methotrexate                    | 1 (3.6)               | 1 (9.1)               | .489    |
| Anti-TNF biologic               | 7 (25.0)              | 6 (54.5)              | .131    |

Quantitative variables expressed as median (quartile 1, quartile 3) and dichotomous variables as n (%).

5-ASA, 5-aminosalicylic acid; TNF, tumor necrosis factor; UC, ulcerative colitis

\*First two groups combined for chi-square test

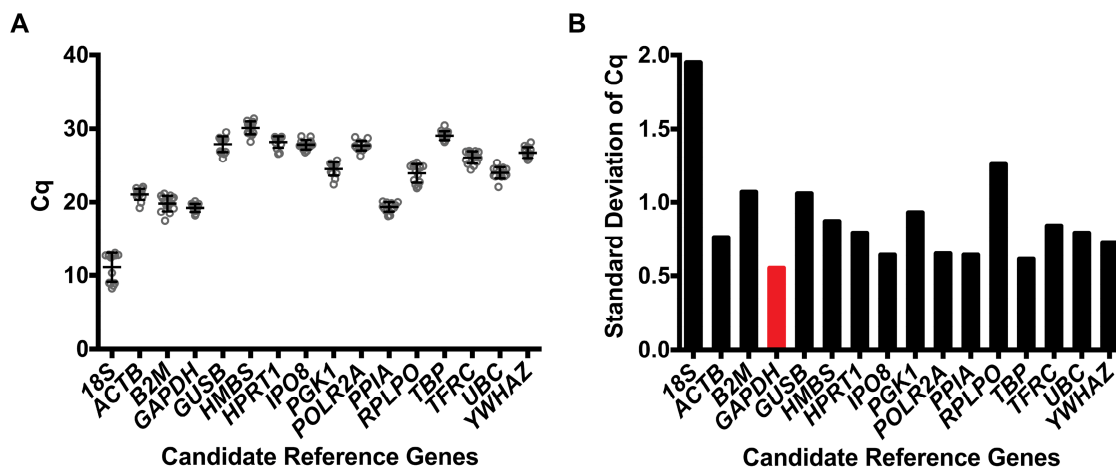

**Figure S1.** Identification of GAPDH as reference gene with least expression variation across diagnosis groups. (A) Dot plot depicting mean Cq and standard errors of 16 candidate reference genes from an endogenous control real-time RT-qPCR microfluidic array (n = 4 each of non-IBD, CDic, CDc, UC). (B) Bar chart depicting standard deviations of the Cq for each candidate reference gene. *GAPDH* exhibited the lowest variability in expression across samples.

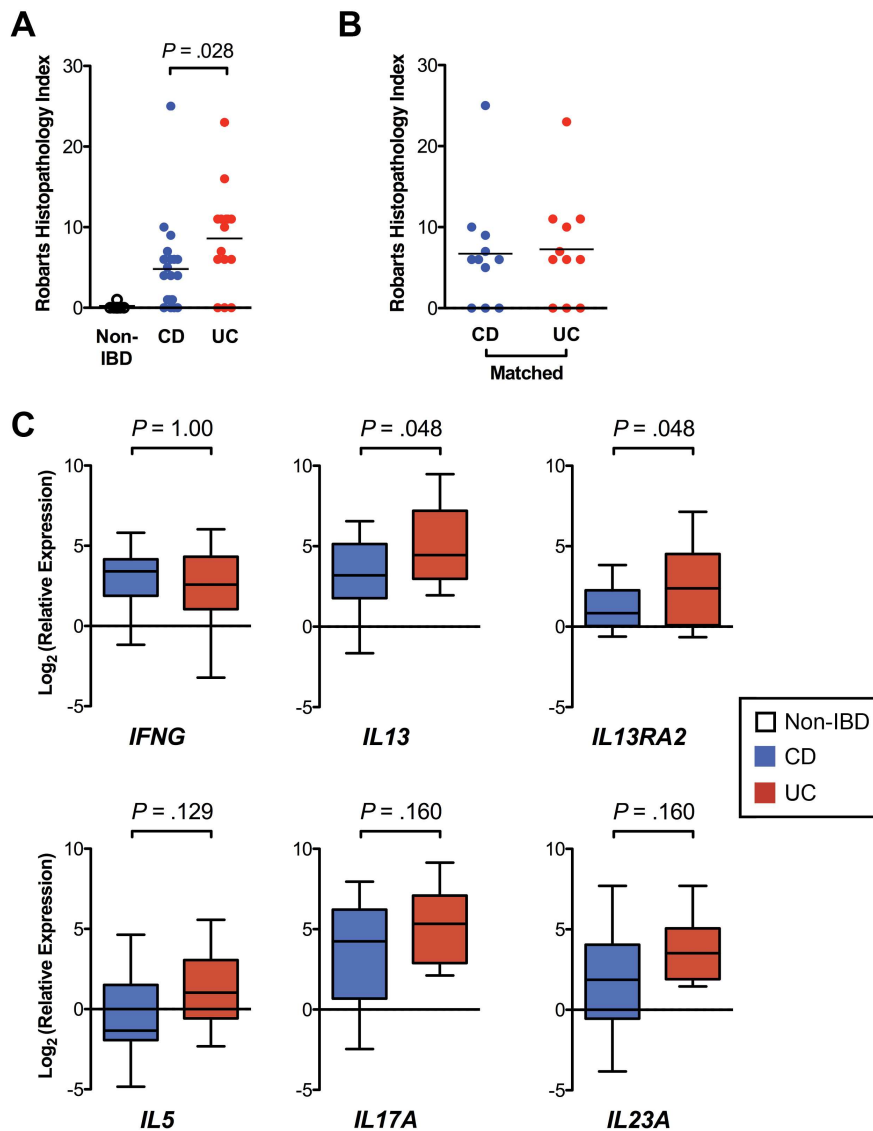

**Figure S2.** Analysis of Cincinnati cohort rectal mucosa real-time RT-qPCR controlling for histologic disease activity. (A) Dot plot of Roberts Histologic Index scores for CD and UC patients in the Cincinnati cohort. (B) Dot plot of a subset of CD and UC patients in the Cincinnati cohort matched on Roberts Histologic Index scores. (C) Box and whisker chart depicting gene expression normalized to median expression of the non-IBD patient group in CD and UC patients matched on Roberts Histologic Index scores (boxes represent median and interquartile range, whiskers represent the 95% confidence interval).
